# Supplementary material for: Two-Dimensional Speckle Tracking Echocardiography in Assessing the Subclinical Myocardial Dysfunction in Patients with Gestational Diabetes Mellitus
Source: Research Square preprint supplement (doi:10.21203/rs.3.rs-1574709/v1), 2022-04-27
Supplement: Supplementary file 1 [file 17b438c4a47eeffa900ffcb7.docx]

Table 1. Clinical characteristics of the study population.

| Variables | Controls | GDM | *p-value* |
| --- | --- | --- | --- |
| Age (years) | 30.74 ± 4.55 | 30.74 ± 4.67 | 0.998 |
| Gestation week | 27.50 ± 3.24 | 28.82 ± 4.95 | 0.096 |
| BMI (kg/m²) | 24.76 ± 2.92 | 27.87 ± 4.11 | < 0.001 |
| SBP (mmHg) | 113.73 ± 9.17 | 117.81 ± 8.10 | 0.017 |
| DBP (mmHg) | 75.08 ± 7.72 | 78.04 ± 5.74 | 0.029 |
| HR (bpm) | 90.11 ± 11.54 | 92.68 ± 10.61 | 0.236 |

Data were presented as mean ± SD and compared by the Student *t*-test.

GDM, gestational diabetes mellitus; BMI, body mass index; SBP, systolic blood pressure; DBP, diastolic blood pressure; HR, heart rate.
