# Supplementary material for: Two-Dimensional Speckle Tracking Echocardiography in Assessing the Subclinical Myocardial Dysfunction in Patients with Gestational Diabetes Mellitus
Source: Research Square preprint supplement (doi:10.21203/rs.3.rs-1574709/v1), 2022-04-27
Supplement: Supplementary file 2 [file 38eb36d92f8a8893e1807b64.docx]

Table 2. Conventional echocardiographic parameters of the study population.

| Variables | Controls | GDM | *p-value* |
| --- | --- | --- | --- |
| IVS (mm) | 8.40 ± 0.93 | 9.46 ± 1.07 | < 0.001 |
| LVPW (mm) | 8.57 ± 0.90 | 9.61 ± 0.99 | < 0.001 |
| LVEDd (mm) | 44.01 ± 2.58 | 44.88 ± 3.09 | 0.112 |
| LVESd (mm) | 22.90 ± 2.92 | 23.89 ± 2.87 | 0.080 |
| RWT | 0.39 ± 0.04 | 0.43 ± 0.05 | < 0.001 |
| LVMI (g/m²) | 69.65 ± 12.92 | 79.86 ± 14.77 | < 0.001 |
| LVEF (%) | 68.08 ± 5.59 | 66.26 ± 6.73 | 0.135 |
| SVI (ml/m²) | 37.66 ± 7.35 | 35.24 ± 6.81 | 0.079 |
| LAVI (ml/m²) | 24.94 ± 6.12 | 23.80 ± 5.77 | 0.322 |
| E velocity (cm/s) | 94.16 ± 14.89 | 90.76 ± 16.72 | 0.277 |
| A velocity (cm/s) | 63.53 ± 13.56 | 67.09 ± 15.94 | 0.226 |
| E/A | 1.54 ± 0.35 | 1.54 ± 0.92 | 0.975 |
| Mean e' (cm/s) | 14.67 ± 2.17 | 13.24 ± 2.34 | 0.002 |
| Mean E/e' | 6.50 ± 1.17 | 7.09 ± 1.77 | 0.053 |

GDM, gestational diabetes mellitus; IVS, interventricular septum; LVPW, left ventricular posterior wall; LVEDd, left ventricular end-diastolic diameter; LVESd, left ventricular end-systolic diameter; RWT, relative wall thickness; LVMI, left ventricular mass index; LVEF, left ventricular ejection fraction; SVI, stroke volume index; LAVI, left atrial volume index.
