# Supplementary material for: Two-Dimensional Speckle Tracking Echocardiography in Assessing the Subclinical Myocardial Dysfunction in Patients with Gestational Diabetes Mellitus
Source: Research Square preprint supplement (doi:10.21203/rs.3.rs-1574709/v1), 2022-04-27
Supplement: Supplementary file 4 [file 4c9a493629dc28d4ed3ff8ad.docx]

Table 3. LV-GLS and LA phasic strain of the study population.

| Variables | Controls | GDM | *p-value* |
| --- | --- | --- | --- |
| LV-GLS (%) | 23.09 ± 2.49 | 18.14 ± 2.53 | < 0.001 |
| LA-Sr (%) | 38.00 ± 7.06 | 32.71 ± 6.64 | < 0.001 |
| LA-Scd (%) | 25.56 ± 5.73 | 20.41 ± 5.69 | < 0.001 |
| LA-Sct (%) | 14.80 ± 3.98 | 14.01 ± 3.74 | 0.298 |

GDM, gestational diabetes mellitus; LV, left ventricular; LA, left atrial; LV-GLS, left ventricular global longitudinal strain; LA-Sr, left atrial reservoir strain; LA-Scd, left atrial conduit strain; LA-Sct, left atrial contractile strain.
