# Supplementary material for: Two-Dimensional Speckle Tracking Echocardiography in Assessing the Subclinical Myocardial Dysfunction in Patients with Gestational Diabetes Mellitus
Source: Research Square preprint supplement (doi:10.21203/rs.3.rs-1574709/v1), 2022-04-27
Supplement: Supplementary file 5 [file 9ce4f45ab256d0104064cb75.docx]

Table 6. Intraclass correlation coefficients tests of strain measurements.

| Variables | Intra-observer ICC | Inter-observer ICC |
| --- | --- | --- |
| LV-GLS (%) | 0.950 | 0.908 |
| LA-Sr (%) | 0.982 | 0.920 |
| LA-Scd (%) | 0.984 | 0.811 |
| LA-Sct (%) | 0.929 | 0.865 |

ICC, intraclass correlation coefficients; Other abbreviations were as shown in Table 3.
