# Supplementary material for: Two-Dimensional Speckle Tracking Echocardiography in Assessing the Subclinical Myocardial Dysfunction in Patients with Gestational Diabetes Mellitus
Source: Research Square preprint supplement (doi:10.21203/rs.3.rs-1574709/v1), 2022-04-27
Supplement: Supplementary file 6 [file a8a8b130b0beed1a6d68f22f.docx]

Table 4. Univariate logistic regression analysis of GDM associated parameters.

| Variables | OR (95% CI) | *p-value* |
| --- | --- | --- |
| Age (years) | 1.000 (0.920-1.087) | 0.998 |
| Gestation week | 1.084 (0.985-1.194) | 0.100 |
| BMI (kg/m²) | 1.289 (1.135-1.465) | < 0.001 |
| SBP (mmHg) | 1.057 (1.008-1.108) | 0.021 |
| DBP (mmHg) | 1.066 (1.005-1.130) | 0.033 |
| HR (bpm) | 1.021 (0.986-1.057) | 0.235 |
| RWT | 3.003 (1.329-6.787) | 0.008 |
| LVMI (g/m²) | 1.054 (1.023-1.086) | 0.001 |
| LVEF (%) | 0.952 (0.893-1.014) | 0.126 |
| SVI (ml/m²) | 0.952 (0.901-1.007) | 0.084 |
| LAVI (ml/m²) | 0.968 (0.907-1.033) | 0.324 |
| E (cm/s) | 0.986 (0.962-1.011) | 0.266 |
| A (cm/s) | 1.017 (0.990-1.044) | 0.214 |
| E/A | 1.011 (0.563-1.815) | 0.971 |
| Mean e' (cm/s) | 0.749 (0.620-0.904) | 0.003 |
| Mean E/e' | 1.278 (0.993-1.646) | 0.057 |
| LV-GLS (%) | 0.461 (0.349-0.608) | < 0.001 |
| LA-Sr (%) | 0.895 (0.842-0.952) | < 0.001 |
| LA-Scd (%) | 0.855 (0.791-0.924) | < 0.001 |
| LA-Sct (%) | 0.948 (0.858-1.048) | 0.300 |

OR, odds ratio; CI, confidence interval; Other abbreviations were as shown in Tables 1, 2, and 3.
