# Supplementary material for: Two-Dimensional Speckle Tracking Echocardiography in Assessing the Subclinical Myocardial Dysfunction in Patients with Gestational Diabetes Mellitus
Source: Research Square preprint supplement (doi:10.21203/rs.3.rs-1574709/v1), 2022-04-27
Supplement: Supplementary file 8 [file 40277606a9eb228fca803e33.docx]

Table 5. Multivariate regression analysis for identifying variables independently associated with GDM.

|  | Variables | OR(95% CI) | *p-value* |
| --- | --- | --- | --- |
| Model 1* |  |  |  |
|  | LV-GLS (%) | 0.439 (0.320-0.603) | < 0.001 |
|  | Mean e' (cm/s) | 0.695 (0.512-0.943) | 0.020 |
| Model 2** |  |  |  |
|  | LA-Scd (%) | 0.874 (0.802-0.952) | 0.002 |
|  | BMI (kg/m²) | 1.173 (1.025-1.342) | 0.020 |
|  | LVMI (g/m²) | 1.041 (1.005-1.078) | 0.023 |

*Adjusted for BP, BMI, RWT and LVMI; **Adjusted for BP, RWT, mean e' and LA-Sr.

OR, odds ratio; CI, confidence interval; Other abbreviations were as shown in Tables 1, 2, and 3.
